# Supplementary material
Source: publisher figshare collection journal article supplement (https://future-science-group.figshare.com/ndownloader/files/38225154)
Supplement: Supplementary file 1 [file 38225154]

**Supplementary Material :** case reports/series

| **First author** | **Histology** | **Line of treatment for advanced setting** | **Treatment** | **Best Response** | **PFS**  **(months)** | **OS**  **(months)** |
| --- | --- | --- | --- | --- | --- | --- |
| Gounant [1] | PSC | > 2^ line | Nivolumab | PR | 10 | - |
| Matsumoto [2] | PSC | 1^ line | Pembrolizumab | PR | - | - |
| Salati [3] | PSC | > 2^ line | Nivolumab | PR (follow up of 28 mo) | ≥ 22 | ≥ 22 |
| Okamura [4] | PSC | > 2^ line | Nivolumab | CR | ≥ 14 | ≥ 14 |
| Kotlowska [5] | PSC | 1^ line | PD-1/PD-L1 checkpoint inhibitor not specified | CR | - | - |
| Senoo [6] | PSC | 2^ line | Nivolumab | PR | ≥ 12 | ≥ 12 |
| Chen [7] | PSC | > 2^ line | Pembrolizumab | PR | 9 | 8 |
| Jin [8] | PSC | 1^ line | Nivolumab + anlotinib | PR | - | - |
| Mayenga [9] | PSC (*METex14*-mutated) | ≥ 2^ line | Nivolumab | CR | 31 (median DOR) | - |
| Kanazu [10] | PSC (3 cases) | ≥ 2^ line | Nivolumab | PR (2 cases)  PD (1 case) | - | - |
| Xu [11] | PSC | 2^ line | Tislelizumab | PR | - | - |
| Kim [12] | LELC | 2^ line | Nivolumab | PD | - | - |
| Kumar [13] | LELC  (2 cases) | > 2^ line | Nivolumab | SD | 25 months (median DOR) | - |
| Xie [14] | NUT (5 cases) | ≥ 2^ line | ICI as single agent (40%) or in combination with CHT (60%) | - | - | 4.1 (median) |
| Wang [15] | LCNEC | 2^ line | Pembrolizumab | PR | - | - |
| Mauclet [16] | LCNEC | 2^ line | Nivolumab | CR | - | - |
| Sato [17] | LCNEC | > 2^ line | Nivolumab | SD | 7 | - |
| Luo [18] | LCC | 1^ line | Sintilimab + anlotinib | PR | 12 | 12 |
| Wang [19] | LCC | 2^ line | Cisplatin + paclitaxel + pembrolizumab for 5 cycles, followed by pembrolizumab maintenance | PR | - | - |
| Okabe [20] | LCC | 2^ line | Pembrolizumab | PR | 24 | - |
| Nakayama [21] | Giant cell carcinoma | 1^ line | Pembrolizumab | PR | - | - |
| **Abbreviations:** PFS, progression-free survival; OS, overall survival; PSC, pulmonary sarcomatoid carcinoma; PR, partial response; CR, complete response; DOR, duration of response; LELC, lymphoepithelioma-like carcinoma; PD, progressive disease; LCNEC, large cell neuroendocrine carcinoma; SD, stable disease; LCC, large cell carcinoma. | | | | | | |

**References**

1. Gounant V, Brosseau S, Naltet C *et al*. Nivolumab-induced organizing pneumonitis in a patient with lung sarcomatoid carcinoma. *Lung Cancer.* 99, 162–165 (2016).
2. Matsumoto Y, Miura T, Horiuchi H, Usui K. The Successful Treatment of Pulmonary Pleomorphic Carcinoma with Pembrolizumab: A Case Report. *Case Rep. Oncol.* 10(2), 752–757 (2017).
3. Salati M, Baldessari C, Calabrese F *et al.* Nivolumab-Induced Impressive Response of Refractory Pulmonary Sarcomatoid Carcinoma with Brain Metastasis. *Case Rep. Oncol.* 11(3), 615–621 (2018).
4. Okamura K, Fukuda Y, Soda H *et al*. Pulmonary pleomorphic carcinoma with few PD-1-positive immune cells and regulatory T cells that showed a complete response to nivolumab. *Thorac. Cancer.* 9(1), 193–196 (2018)
5. Kotlowska MP, Rueda AG, Olmedo ME *et al.* Efficacy of immunotherapy in sarcomatoid lung cancer, a case report and literature review. *Respir. Med. Case Reports.* 26, 310-314 (2019).
6. Senoo S, Ninomiya T, Makimoto G *et al.* Rapid and Long-term Response of Pulmonary Pleomorphic Carcinoma to Nivolumab. *Intern. Med.* 58(7), 985–989 (2019).
7. Chen P, Yu M, Zhang J-L *et al.* Significant benefits of pembrolizumab in treating refractory advanced pulmonary sarcomatoid carcinoma: A case report. *World J. Clin. Cases.* 8(13), 2876–2884 (2020).
8. Jin C, Yang B. Dramatic Response of Pulmonary Sarcomatoid Carcinoma to Nivolumab Combined with Anlotinib: A Case Report. *Case Rep. Oncol.* 13(2), 601–605 (2020).
9. Mayenga M, Assié JB, Monnet I *et al*. Durable responses to immunotherapy of non-small cell lung cancers harboring MET exon-14–skipping mutation: A series of 6 cases. *Lung Cancer.* 150:21-25 (2020).
10. Kanazu M, Uenami T, Yano Y *et al.* Case series of pleomorphic carcinomas of the lung treated with nivolumab. *Thorac. Cancer.* 8(6), 724–728 (2017).
11. Xu L, Tao N-N, Liang B, Li D-W, Li H-C, Su L-L. Use of PD-1 inhibitor tislelizumab in the treatment of advanced pulmonary sarcomatoid carcinoma: A case report. *Thorac. Cancer.* 13(3), 502-505 (2022).
12. Kim C, Rajan A, DeBrito PA, Giaccone G. Metastatic lymphoepithelioma-like carcinoma of the lung treated with nivolumab: a case report and focused review of literature. *Transl. Lung Cancer Res.* 5(6), 720–726 (2016).
13. Kumar V, Dave V, Harris J, Huang Y. Response of advanced stage recurrent lymphoepithelioma-like carcinoma to nivolumab. *Immunotherapy.* 9(12), 955–961 (2017).
14. Xie XH, Wang LQ, Qin YY *et al.* Clinical features, treatment, and survival outcome of primary pulmonary NUT midline carcinoma. *Orphanet J. Rare Dis.* 15(1), 1–10 (2020)
15. Wang VE, Urisman A, Albacker L *et al.* Checkpoint inhibitor is active against large cell neuroendocrine carcinoma with high tumor mutation burden. *J. Immunother. Cancer.* 5(1), 75 (2017).
16. Mauclet C, Duplaquet F, Pirard L *et al.* Complete tumor response of a locally advanced lung large-cell neuroendocrine carcinoma after palliative thoracic radiotherapy and immunotherapy with nivolumab. *Lung Cancer.* 128, 53–56 (2019).
17. Sato M, Ikezawa Y, Sato M, Suzuki A, Kawai Y. Large cell neuroendocrine carcinoma of the lung that responded to nivolumab: A case report. *Mol. Clin. Oncol.* 13(1), 43–47 (2020).
18. Luo Z, Zhang H, Xiao Y *et al.* Durable Response to Immunotherapy With Antiangiogenic Drug in Large-Cell Lung Carcinoma With Multiple Fulminant Postoperative Metastases: A Case Report. *Front. Oncol.* 11, 63344611 (2021).
19. Wang G, Chai Q, Xiao Y *et al.* Case Report: Therapeutic Response to Chemo-Immunotherapy in an Advanced Large Cell Lung Carcinoma Patient With Low Values of Multiple Predictive Biomarkers. *Front. Immunol.* 11, 60741611 (2021).
20. Okabe N, Mine H, Takagi H *et al*. Pulmonary large cell carcinoma, highly positive for PD-L1, shows marked response to pembrolizumab: A case report. *Thorac. Cancer.* 12(7), 1141–1144 (2021)
21. Nakayama S, Sasaki M, Morinaga S, Minematsu N. Nonsmall Cell Lung Carcinoma with Giant Cell Features Expressing Programmed Death-Ligand 1: A Report of a Patient Successfully Treated with Pembrolizumab. *Case Rep. Oncol. Med.* 2018, 5863015 (2018).
